# Supplementary material for: Fibroblasts of Machado Joseph Disease patients reveal autophagy impairment
Source: PubMed Central journal article supplement (PMC4916410; doi:10.1038/srep28220), 2016-06-22
Supplement: srep28220-s1.pdf [file srep28220-s1.pdf]

# Fibroblasts of Machado Joseph Disease patients reveal autophagy impairment

Isabel Onofre<sup>1,2¶</sup>, Nuno Mendonça<sup>1,3,4¶</sup>, Sara Lopes<sup>1,5</sup>, Rui Nobre<sup>1,5</sup>, Joana Barbosa de Melo<sup>1,4,6</sup>, Isabel Marques Carreira<sup>1,4,6</sup>, Cristina Januário<sup>3,4</sup>, António Freire Gonçalves<sup>3,4</sup> and Luis Pereira de Almeida<sup>1,2</sup>

1- CNC - Center for Neuroscience and Cell Biology, Coimbra, Portugal

2- Faculty of Pharmacy, University of Coimbra, Coimbra, Portugal

3- Neurology Department, Coimbra University Hospital Center, Coimbra, Portugal

4- Faculty of Medicine, University of Coimbra, Portugal

5- IIIUC- Institute for Interdisciplinary Research, University of Coimbra, Coimbra, Portugal

6- *Cytogenetics and Genomics Laboratory, Faculty of Medicine, University of Coimbra, Coimbra, Portugal*

¶ - Equal contribution

Corresponding author:

Luis Pereira de Almeida ([luispa@cnc.uc.pt](mailto:luispa@cnc.uc.pt))

## Supplemental Information

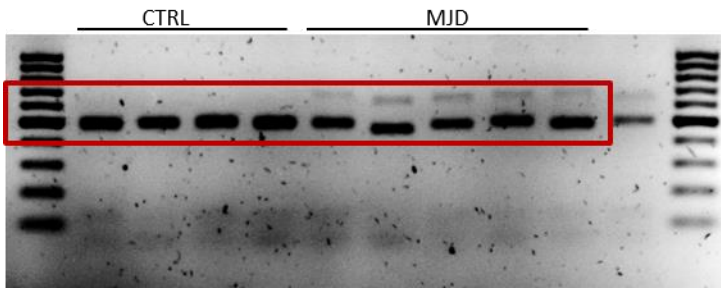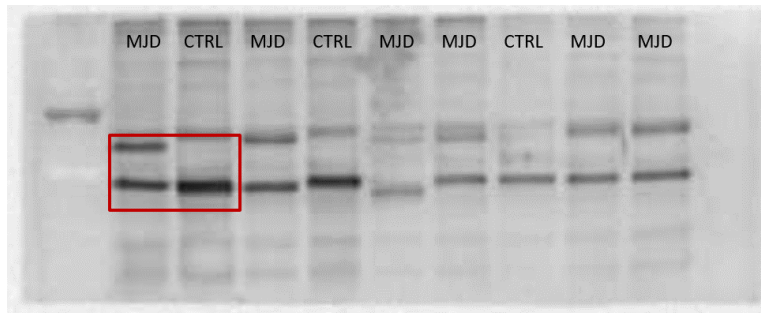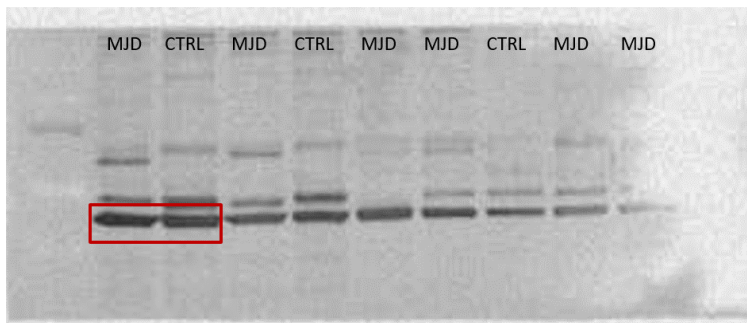

S1- Full length agarose gel relative to Fig 3C and full length western blot membrane relative to Fig 3D. Red boxes indicate the cropping lines used to generate the figures.

## Supplemental Information

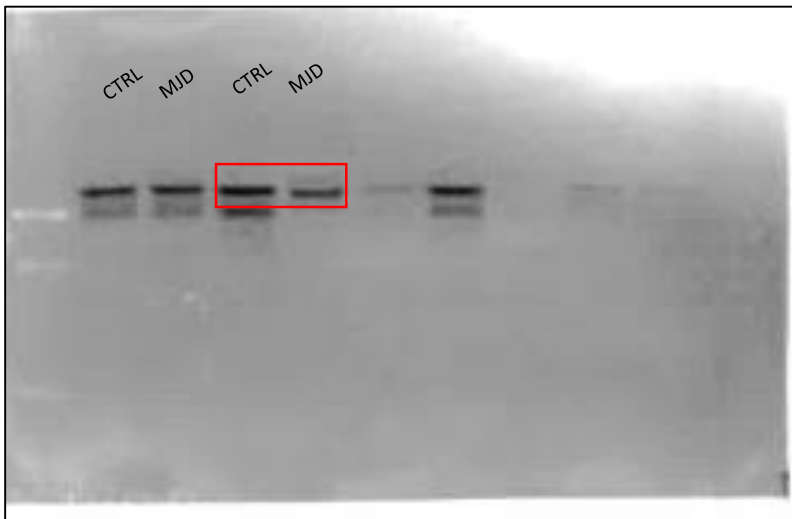

Western blot  
membrane  
Beclin-1

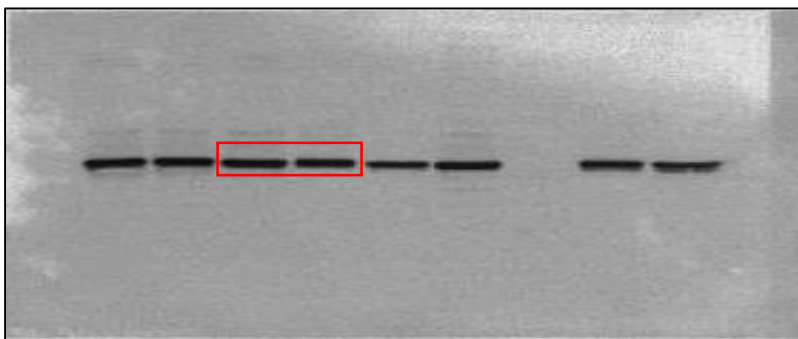

Western blot  
membrane  
Actin/Beclin-1

S2- Full length western blot membranes relative to Fig 4A. Red boxes indicate the cropping lines used to generate the figures.

## Supplemental Information- Figure 4

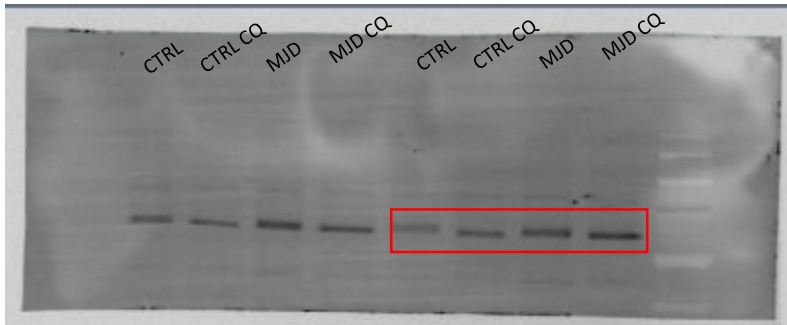

Western blot  
membrane  
p62

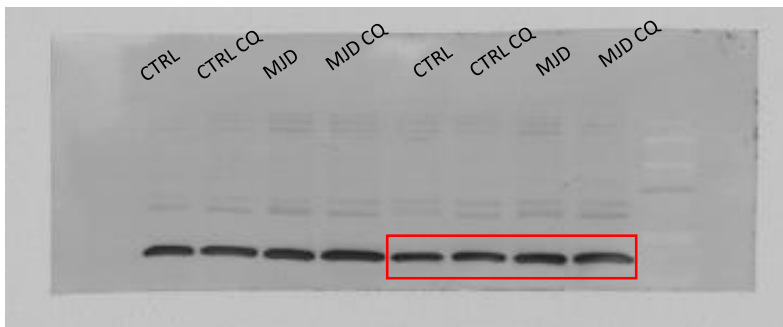

Western blot  
membrane  
Actin/p62

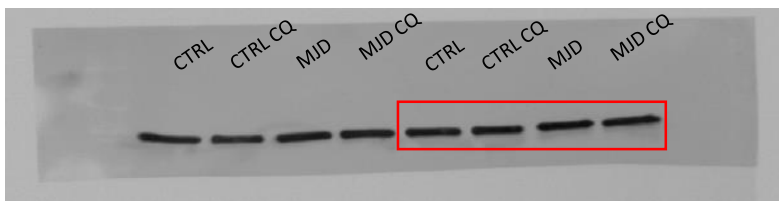

Western blot  
membrane  
Actin/LC3

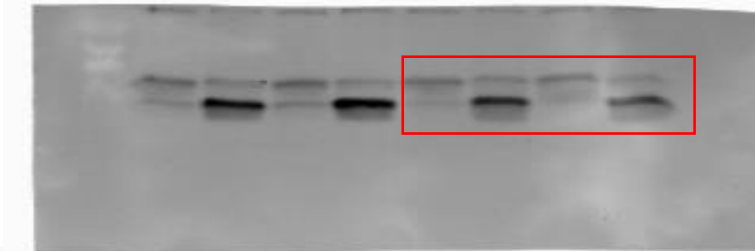

Western blot  
membrane  
LC3

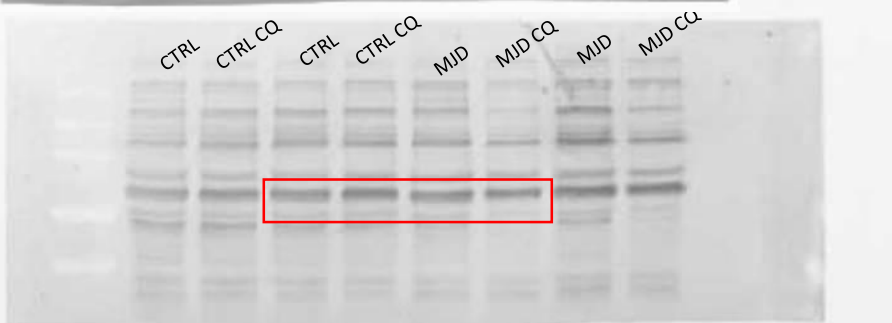

Western blot  
membrane  
Beclin-1

S2- Full length western blot membranes relative to Fig 4D. Red boxes indicate the cropping lines used to generate the figures.

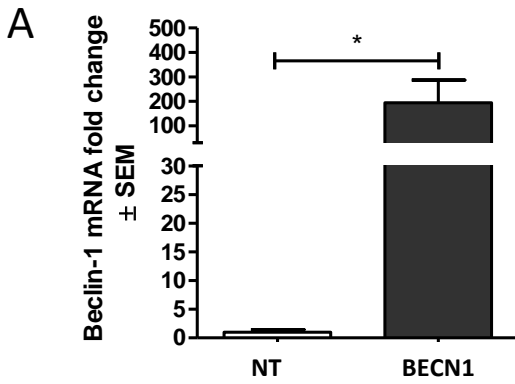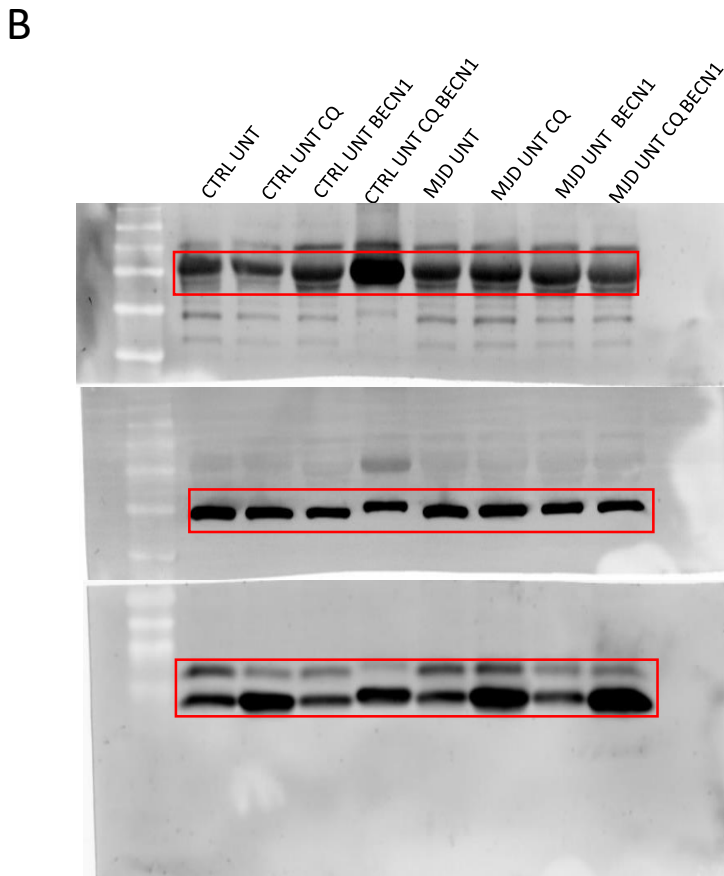

S3- A- Quantification of Beclin-1 mRNA levels on transduced fibroblasts after transduction with a lentiviral vector coding for human beclin-1. GAPDH was used as reference gene and presented levels were normalized for NT (non transduced) condition (Student t-test  $n=4/n=4$  \* $p=0.05$ ).

B-Full length western blot membranes relative to Fig 5A. Red boxes indicate the cropping lines used to generate the figures.
